# Supplementary material for: Synthesis and antiproliferative activity of 1H-1,2,3-triazole-4H-chromene-d-glucose hybrid compounds with dual inhibitory activity against EGFR/VEGFR-2 and molecular docking studies
Source: Royal Society of Chemistry journal article supplement (doi:10.1039/d2nj04373d), 2022-01-01
Supplement: d2nj04373d1.pdf [file d2nj04373d1.pdf]

Supplementary Information

Table of Contents

|                                                                                                                                                                                                                                   |                              |
|-----------------------------------------------------------------------------------------------------------------------------------------------------------------------------------------------------------------------------------|------------------------------|
| <b>1. Experimental</b> .....                                                                                                                                                                                                      | Error! Bookmark not defined. |
| Preparation of ionic liquid THEAA .....                                                                                                                                                                                           | 2                            |
| Procedure for preparation of CuNPs .....                                                                                                                                                                                          | 2                            |
| <b>2. Selected <sup>1</sup>H NMR, <sup>13</sup>C NMR and mass spectra of substituted 2-amino-4-aryl-7-((1-(2,3,4,6-tetra-O-acetyl-β-D-glucopyranosyl)-1H-1,2,3-triazol-4-yl)methoxy)-4H-chromene-3-carbonitriles (7a-o)</b> ..... | <b>2</b>                     |
| 2-Amino-4-(4-chloro-3-nitrophenyl)-7-((1-(2,3,4,6-tetra-O-acetyl-β-D-glucopyranosyl)-1H-1,2,3-triazol-4-yl)methoxy)-4H-chromene-3-carbonitrile (7c) .....                                                                         | 3                            |
| 2-Amino-4-(2-chloro-4-methylphenyl)-7-((1-(2,3,4,6-tetra-O-acetyl-β-D-glucopyranosyl)-1H-1,2,3-triazol-4-yl)methoxy)-4H-chromene-3-carbonitrile (7d) .....                                                                        | 5                            |
| 2-Amino-4-(2-chloro-4-methoxyphenyl)-7-((1-(2,3,4,6-tetra-O-acetyl-β-D-glucopyranosyl)-1H-1,2,3-triazol-4-yl)methoxy)-4H-chromene-3-carbonitrile (7e) .....                                                                       | 7                            |
| 2-Amino-4-(2,3-dihydroxyphenyl)-7-((1-(2,3,4,6-tetra-O-acetyl-β-D-glucopyranosyl)-1H-1,2,3-triazol-4-yl)methoxy)-4H-chromene-3-carbonitrile (7f) .....                                                                            | 8                            |
| 2-Amino-4-(2,4-dihydroxyphenyl)-7-((1-(2,3,4,6-tetra-O-acetyl-β-D-glucopyranosyl)-1H-1,2,3-triazol-4-yl)methoxy)-4H-chromene-3-carbonitrile (7g) .....                                                                            | 10                           |
| 2-Amino-4-(2,6-dimethoxyphenyl)-7-((1-(2,3,4,6-tetra-O-acetyl-β-D-glucopyranosyl)-1H-1,2,3-triazol-4-yl)methoxy)-4H-chromene-3-carbonitrile (7j) .....                                                                            | 11                           |
| 2-Amino-4-(2-hydroxy-4-methoxyphenyl)-7-((1-(2,3,4,6-tetra-O-acetyl-β-D-glucopyranosyl)-1H-1,2,3-triazol-4-yl)methoxy)-4H-chromene-3-carbonitrile (7k) .....                                                                      | 13                           |
| 2-Amino-4-(3-hydroxy-4-methoxyphenyl)-7-((1-(2,3,4,6-tetra-O-acetyl-β-D-glucopyranosyl)-1H-1,2,3-triazol-4-yl)methoxy)-4H-chromene-3-carbonitrile (7l) .....                                                                      | 14                           |
| 2-Amino-4-(4-ethoxy-3-hydroxyphenyl)-7-((1-(2,3,4,6-tetra-O-acetyl-β-D-glucopyranosyl)-1H-1,2,3-triazol-4-yl)methoxy)-4H-chromene-3-carbonitrile (7m) .....                                                                       | 16                           |
| 2-Amino-4-(4-hydroxy-3-methoxy-5-nitrophenyl)-7-((1-(2,3,4,6-tetra-O-acetyl-β-D-glucopyranosyl)-1H-1,2,3-triazol-4-yl)methoxy)-4H-chromene-3-carbonitrile (7n) .....                                                              | 17                           |
| 2-Amino-4-(5-chloro-2-hydroxy-3-nitrophenyl)-7-((1-(2,3,4,6-tetra-O-acetyl-β-D-glucopyranosyl)-1H-1,2,3-triazol-4-yl)methoxy)-4H-chromene-3-carbonitrile (7o) .....                                                               | 19                           |

## **Preparation of ionic liquid THEAA**

Ionic liquid tri-(2-hydroxyethyl)ammonium acetate [ $^+HN(CH_2CH_2OH)_3$ ][ $^-OAc$ ] (THEAA) was prepared by neutralization of ethanolamine in ethanol with glacial acetic acid. Triethanolamine (0.5 mol, 74.5 g) was dissolved in 100 mL of absolute ethanol to form a liquid mixture. This mixture was placed in a water bath of 25 °C and equipped with a reflux condenser under vigorous stirring with a magnetic stirrer. A solution of acetic acid (0.5 mol) in absolute ethanol (100 mL) was added dropwise to the flask in about 90 min. The reaction lasted for 2 h. The solvent was removed by evaporation under reduced pressure. The resulting crude residue was dried under vacuum at 50 °C for 48 h.

### ***Procedure for preparation of CuNPs@Montmorillonite K10***

The solution A was prepared by dissolving an amount of  $Cu(OCOCH_3)_2 \cdot 2H_2O$  (0.3 mmol, 59.8 mg) in water (20 mL). The solution of cetyltrimethylammonium bromide (CTAB, 0.15 mmol, 54.6 mg) in 20 mL of water was poured gradually to the above solution of copper(II) acetate. Then, ammonia solution (25%) was slowly dropped until the solution pH to equal 10, when the colour of solution changed from light blue to dark blue without formation of any precipitate. The solution B was prepared by dropping hydrazine hydrate solution 85% (1.5 mmol, 48 mg, 0.047 mL) to the solution of CTAB (0.15 mmol, 54.6 mg) in 20 mL of water. After that, solution A was added dropwise to solution B that continuously stirred and heated till the temperature reached 80 °C. At the moment, the solution colour changed from colourless to light yellow to orange to brown and finally to red colour, which confirmed the formation of metallic colloidal suspension. After 30 min stirring, Montmorillonite K10 (1 g) was added gradually with stirring to the metallic solution at 80 °C, the resulting paste of copper/clay nanocomposite (CuNPs) was filtered, washed with water (4×30 mL), and dried at 70 °C for 18 h designated as CuNP, a solid of ivory colour. Yield: 1.75 g (87.5%).

2. Selected  $^1\text{H}$  NMR,  $^{13}\text{C}$  NMR and mass spectra of substituted 2-amino-4-aryl-7-((1-(2,3,4,6-tetra-*O*-acetyl- $\beta$ -D-glucopyranosyl)-1*H*-1,2,3-triazol-4-yl)methoxy)-4*H*-chromene-3-carbonitriles (7a-o)

2-Amino-4-(4-chloro-3-nitrophenyl)-7-((1-(2,3,4,6-tetra-*O*-acetyl- $\beta$ -D-glucopyranosyl)-1*H*-1,2,3-triazol-4-yl)methoxy)-4*H*-chromene-3-carbonitrile (7c)

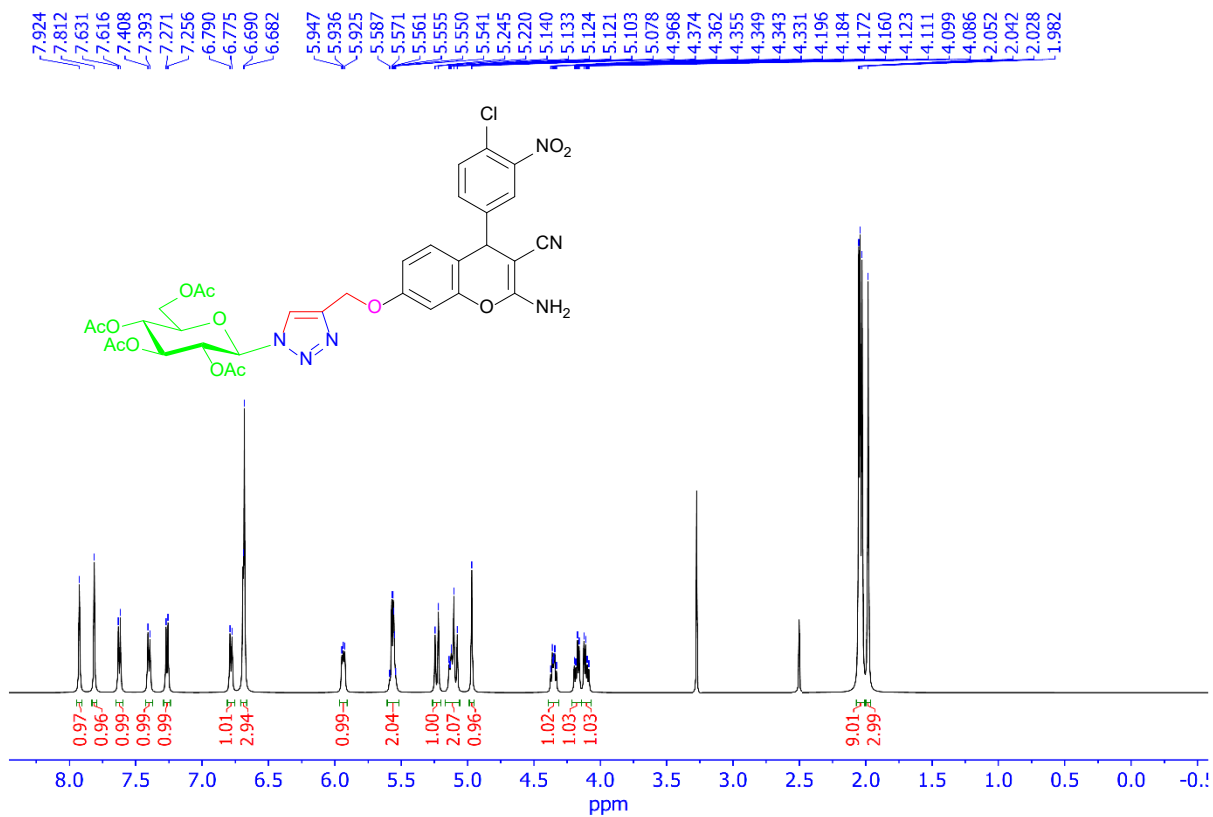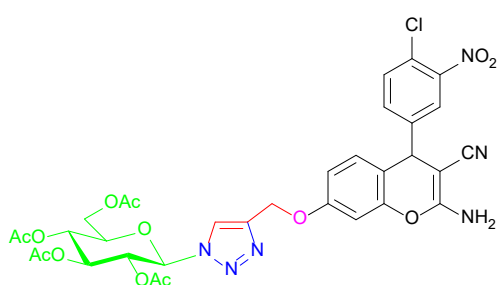

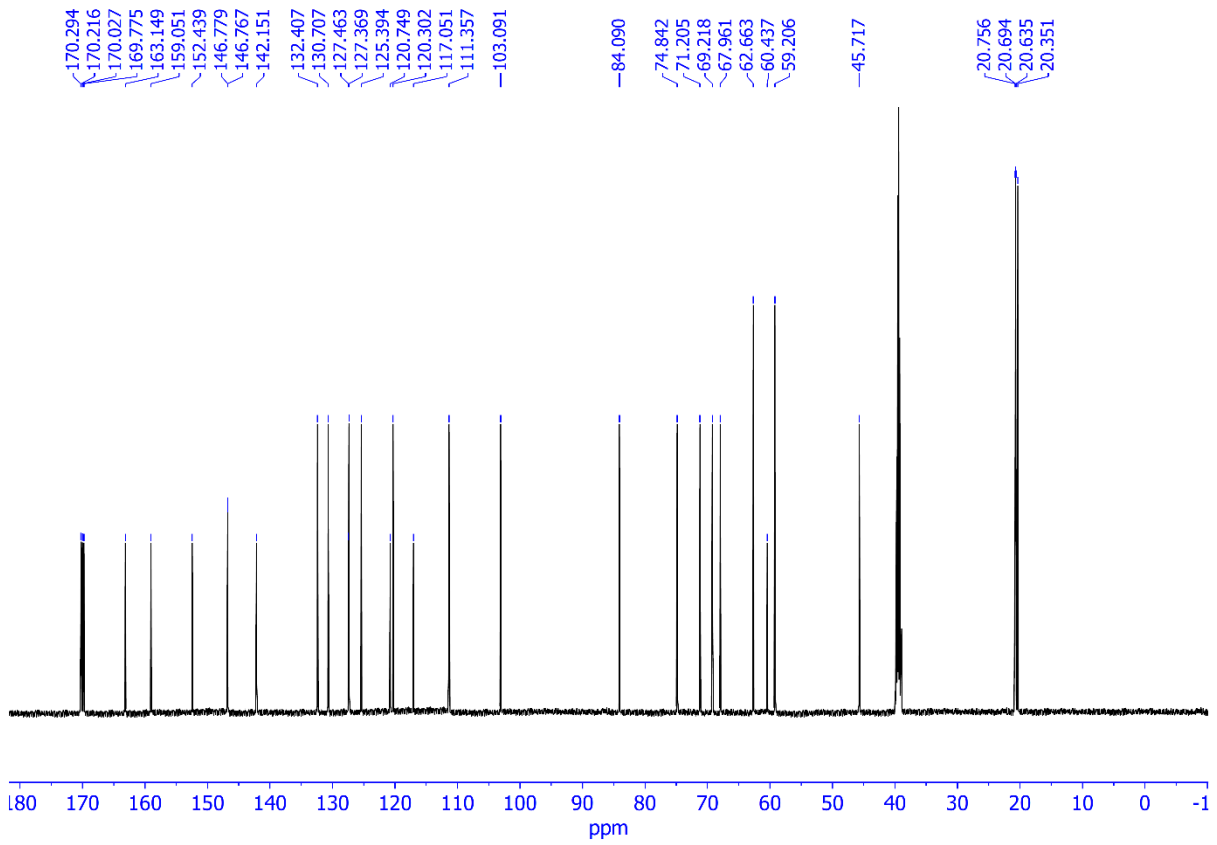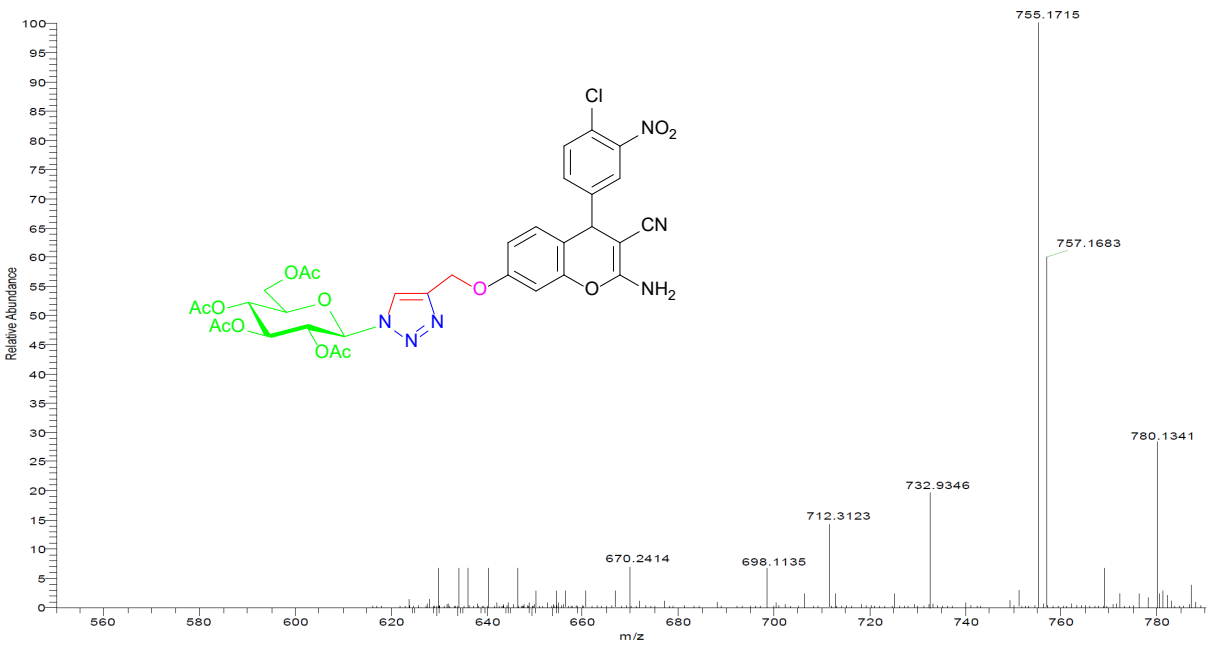

**2-Amino-4-(2-chloro-4-methylphenyl)-7-((1-(2,3,4,6-tetra-O-acetyl- $\beta$ -D-glucopyranosyl)-1H-1,2,3-triazol-4-yl)methoxy)-4H-chromene-3-carbonitrile (7d)**

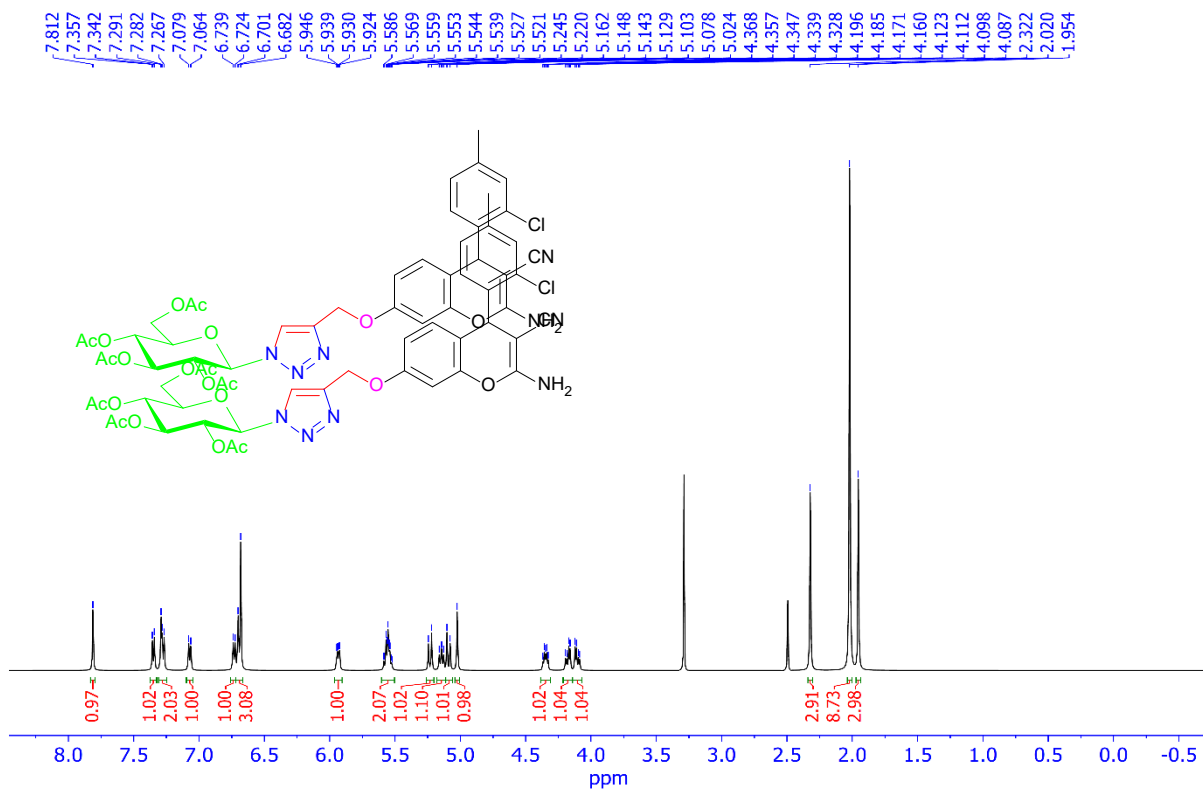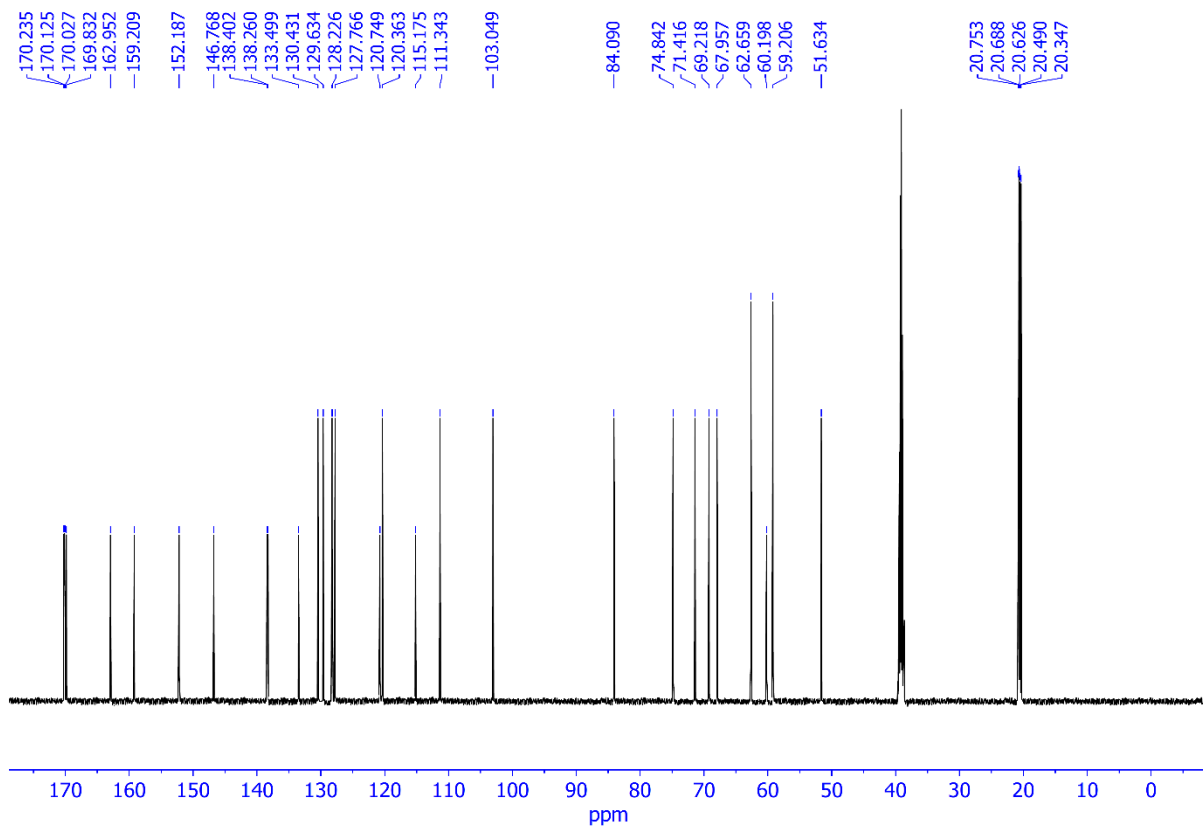

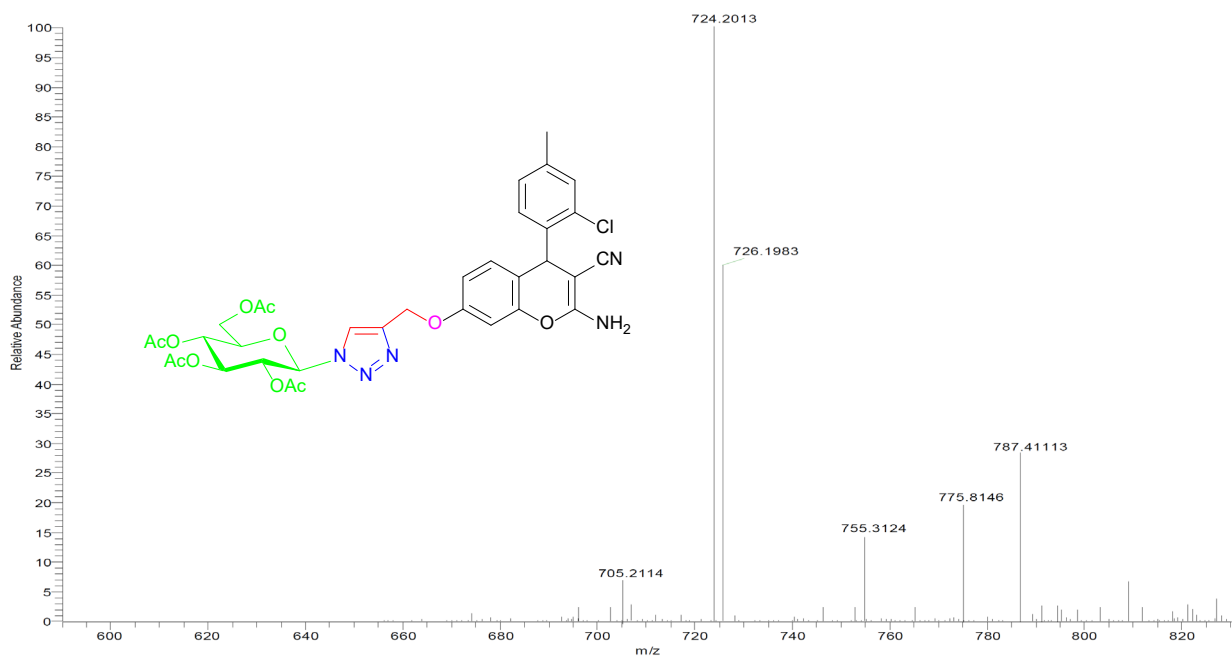

**2-Amino-4-(2-chloro-4-methoxyphenyl)-7-((1-(2,3,4,6-tetra-O-acetyl-β-D-glucopyranosyl)-1H-1,2,3-triazol-4-yl)methoxy)-4H-chromene-3-carbonitrile (7e)**

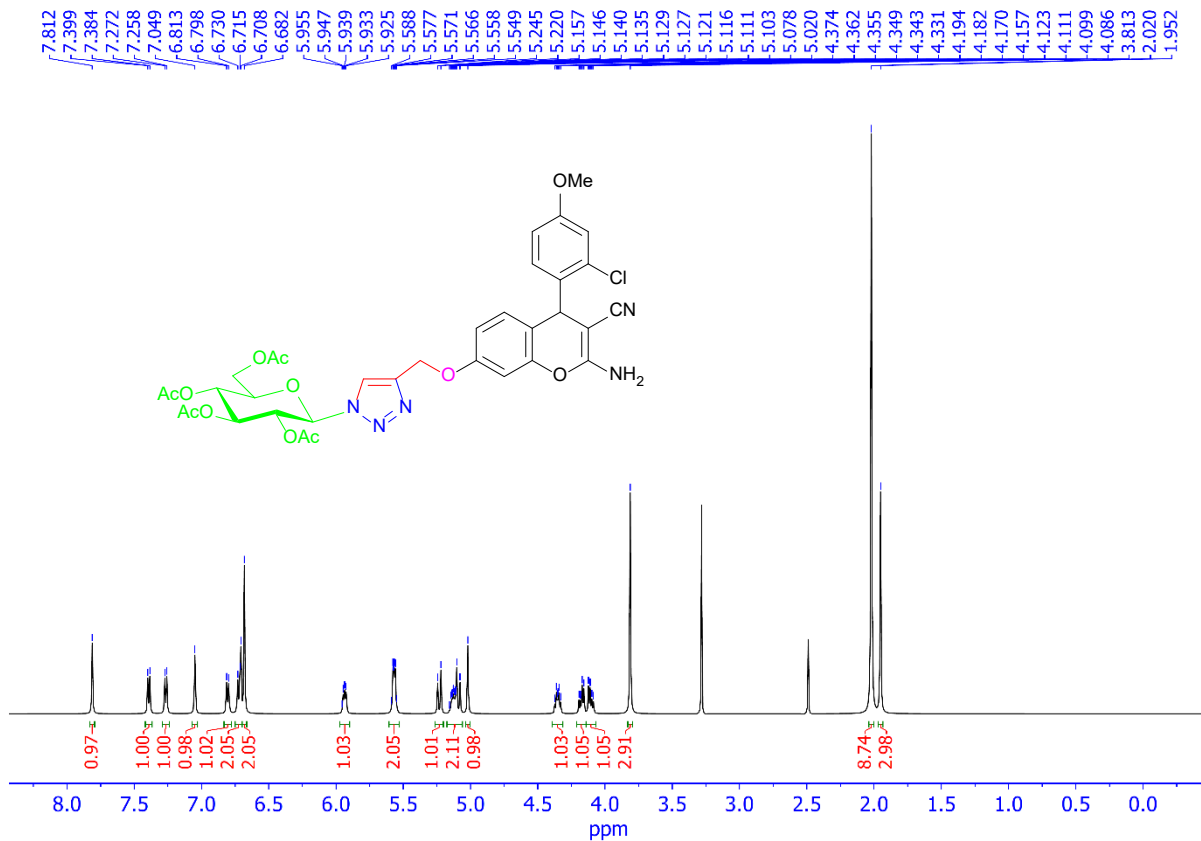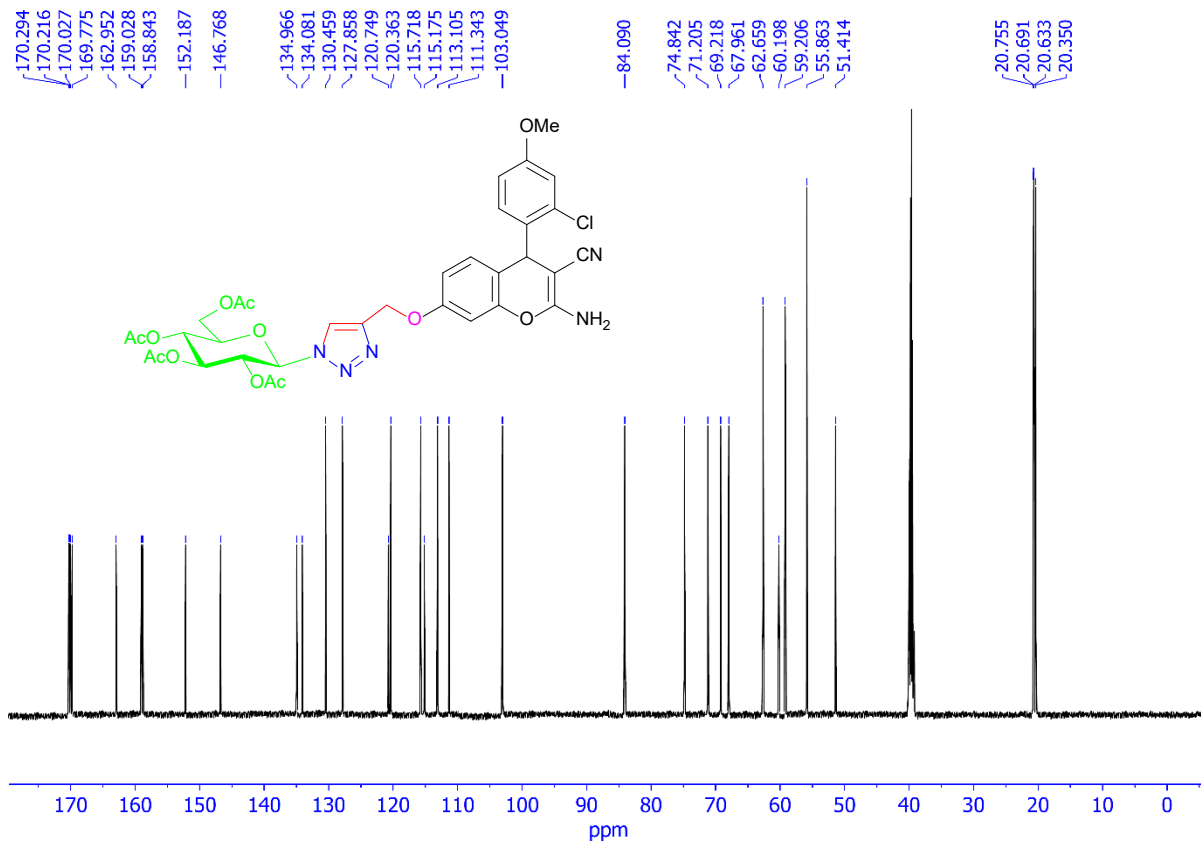

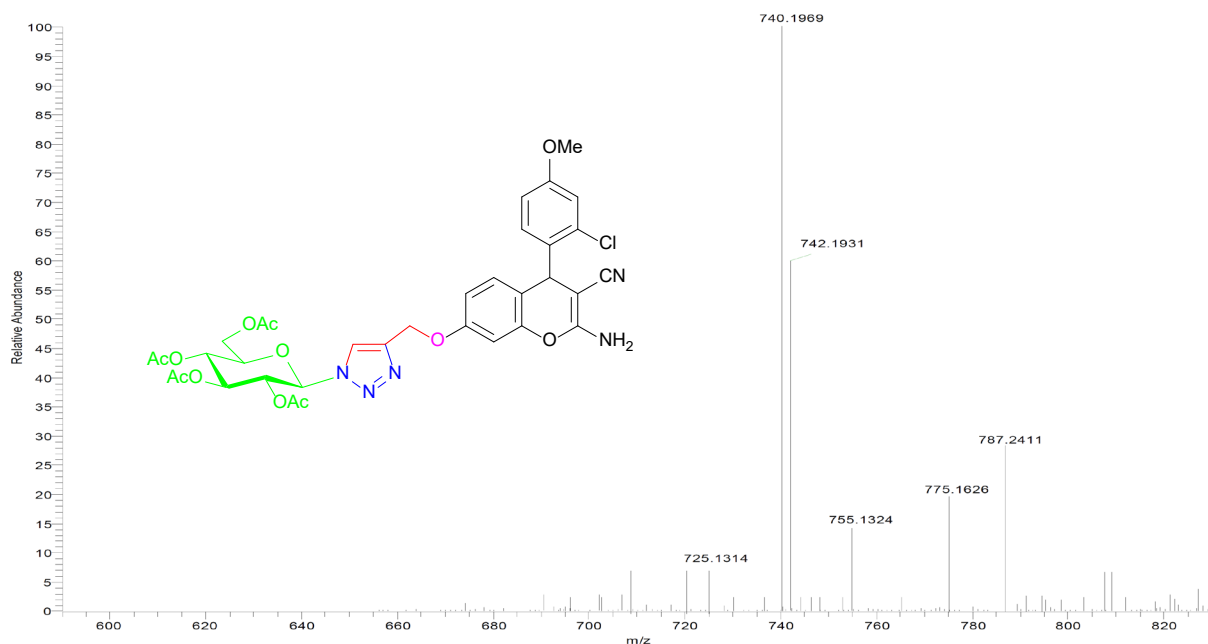

**2-Amino-4-(2,3-dihydroxyphenyl)-7-((1-(2,3,4,6-tetra-O-acetyl-β-D-glucopyranosyl)-1H-1,2,3-triazol-4-yl)methoxy)-4H-chromene-3-carbonitrile (7f)**

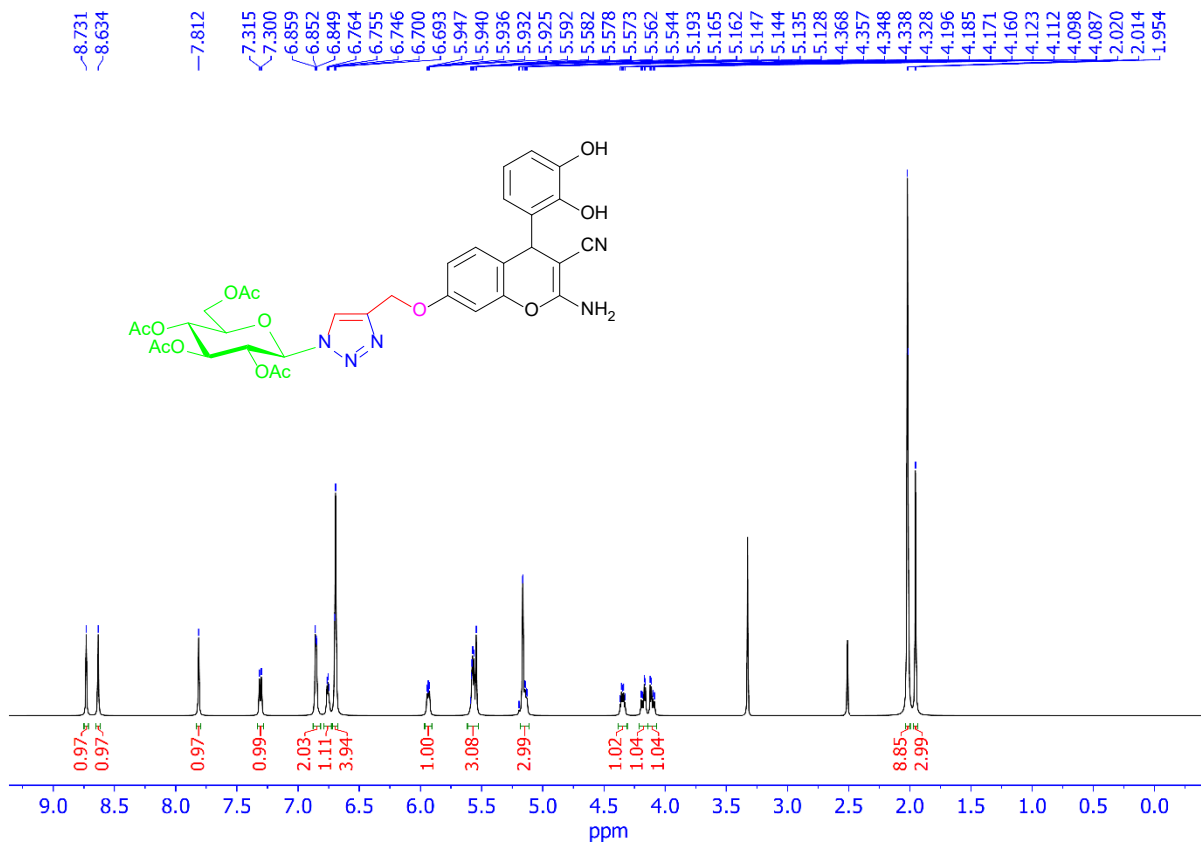



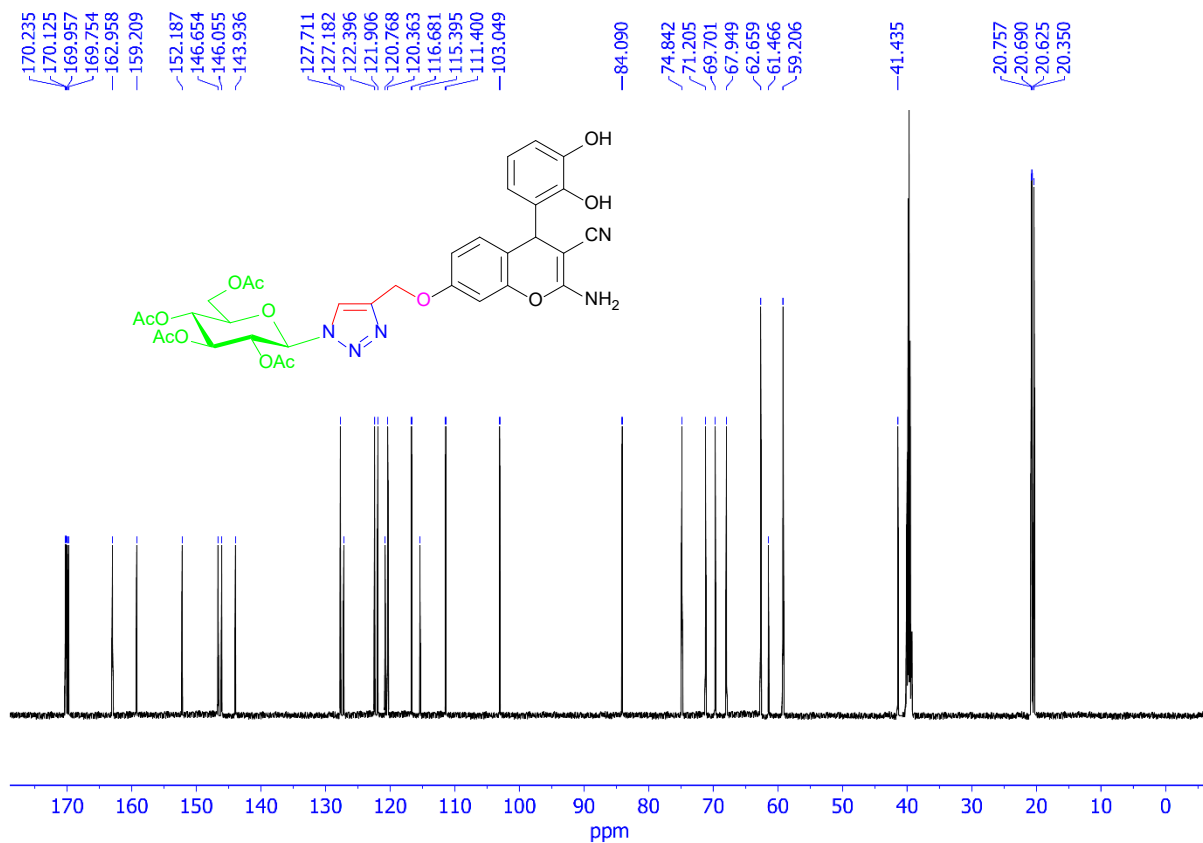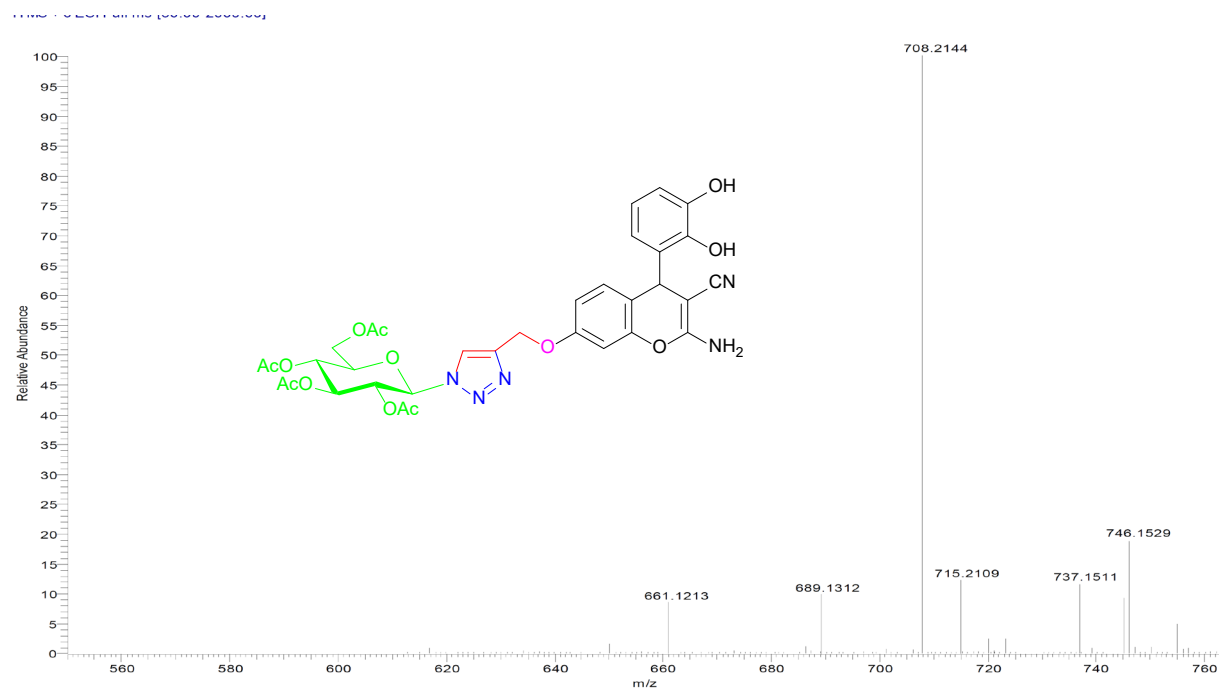

**2-Amino-4-(2,4-dihydroxyphenyl)-7-((1-(2,3,4,6-tetra-O-acetyl-β-D-glucopyranosyl)-1H-1,2,3-triazol-4-yl)methoxy)-4H-chromene-3-carbonitrile (7g)**

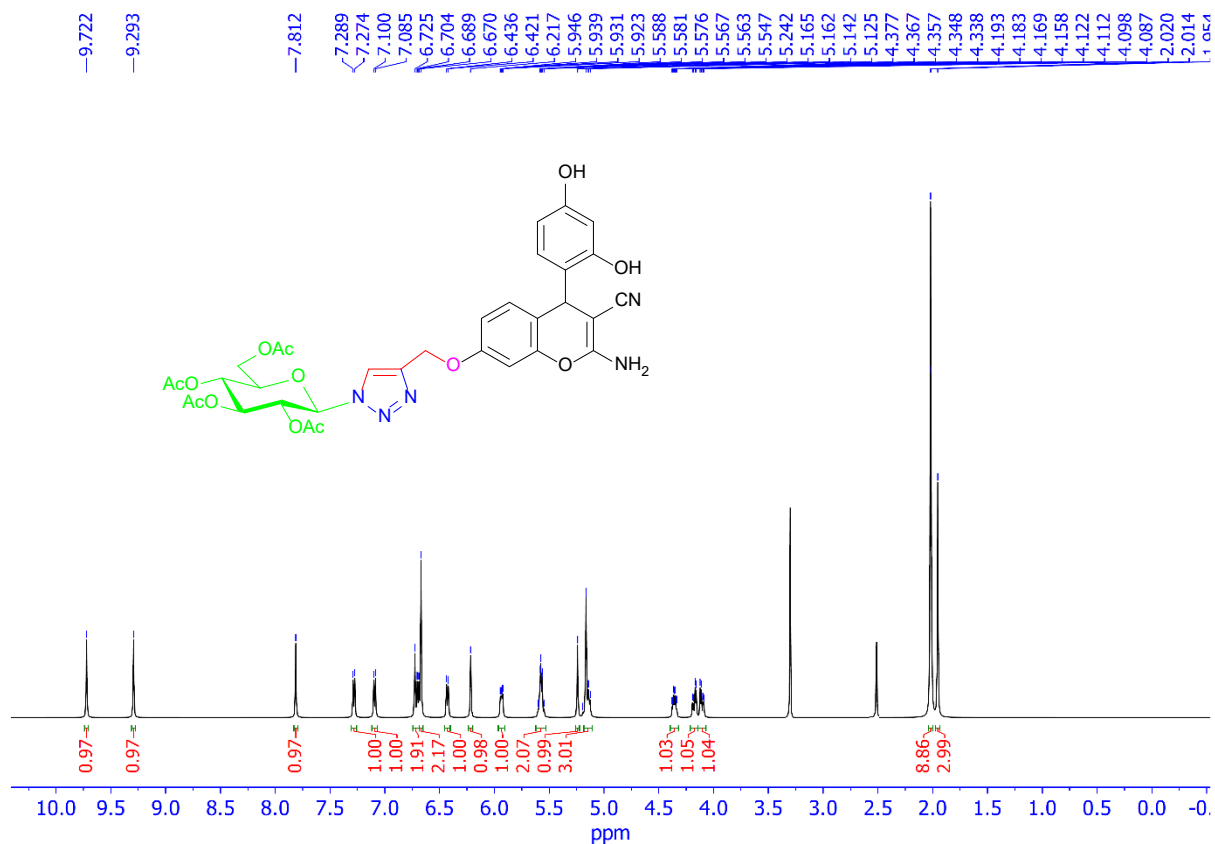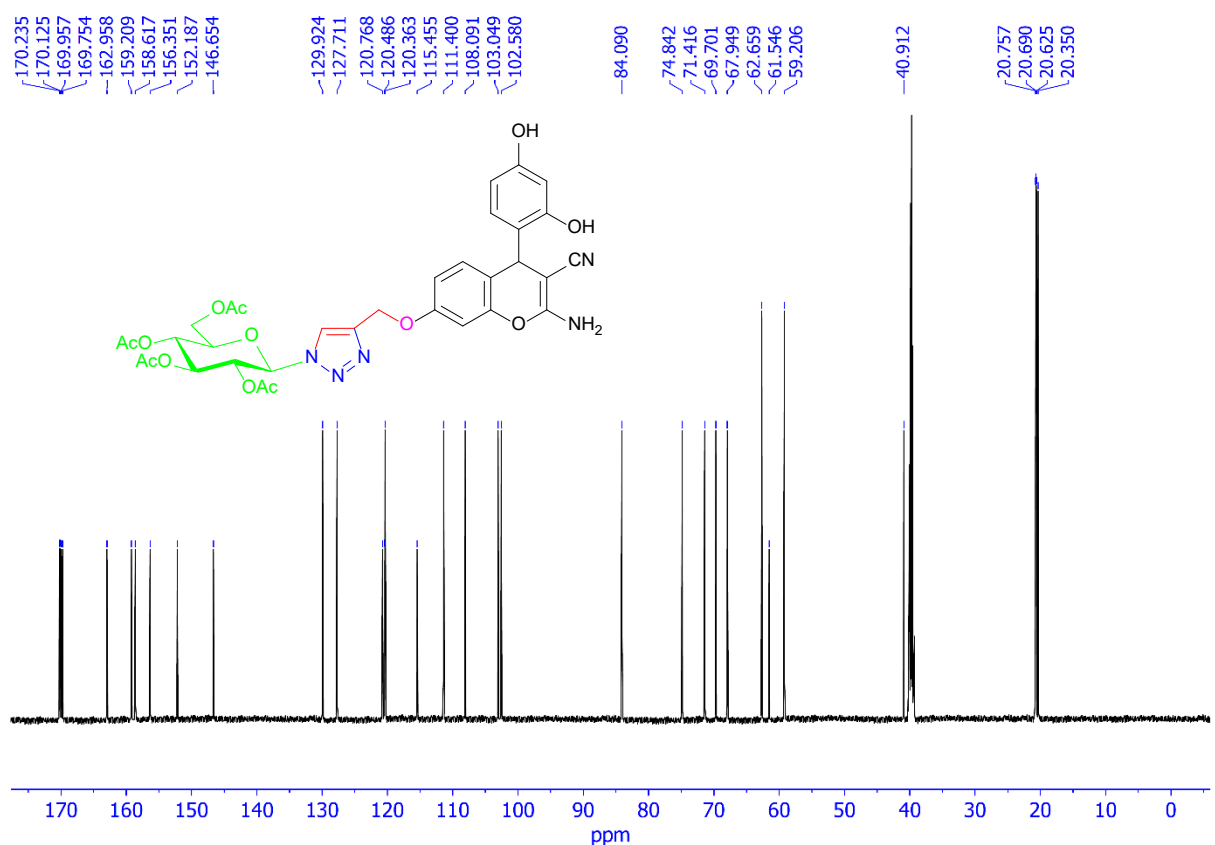



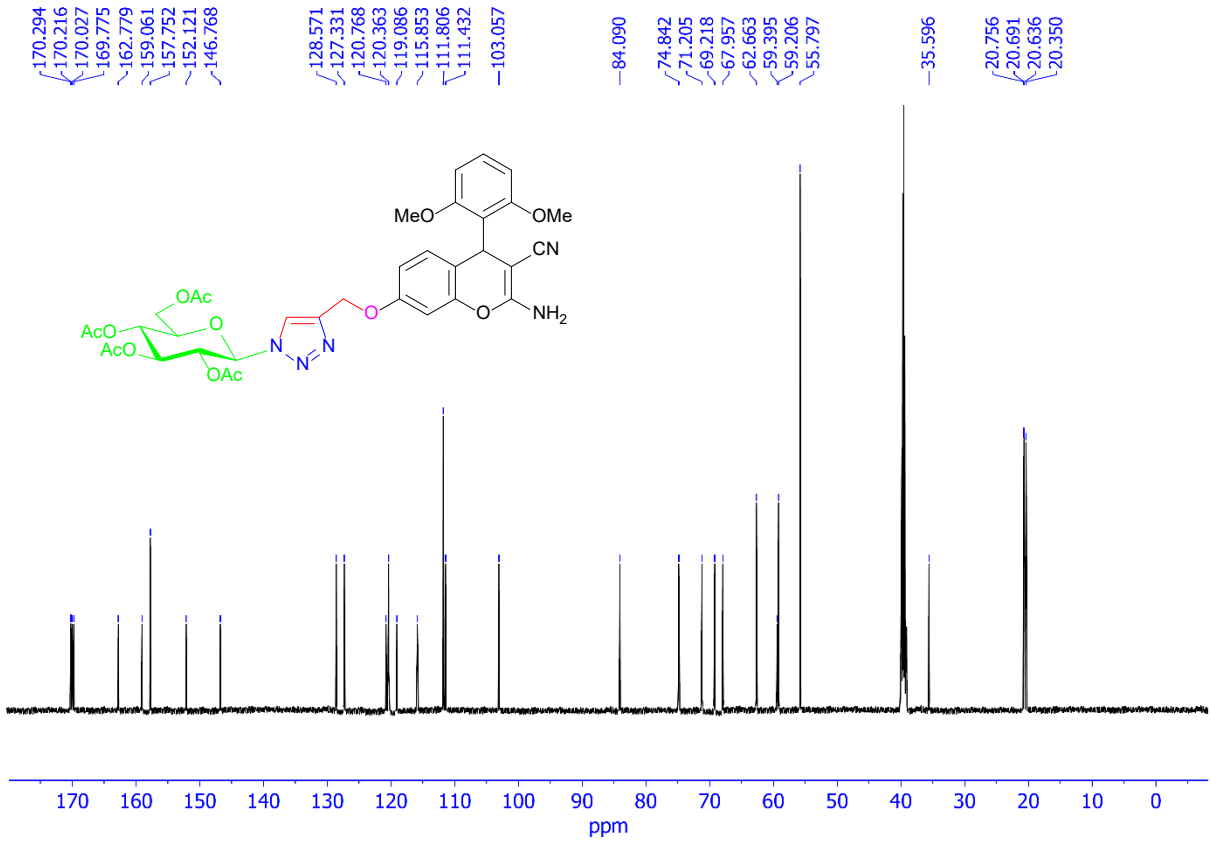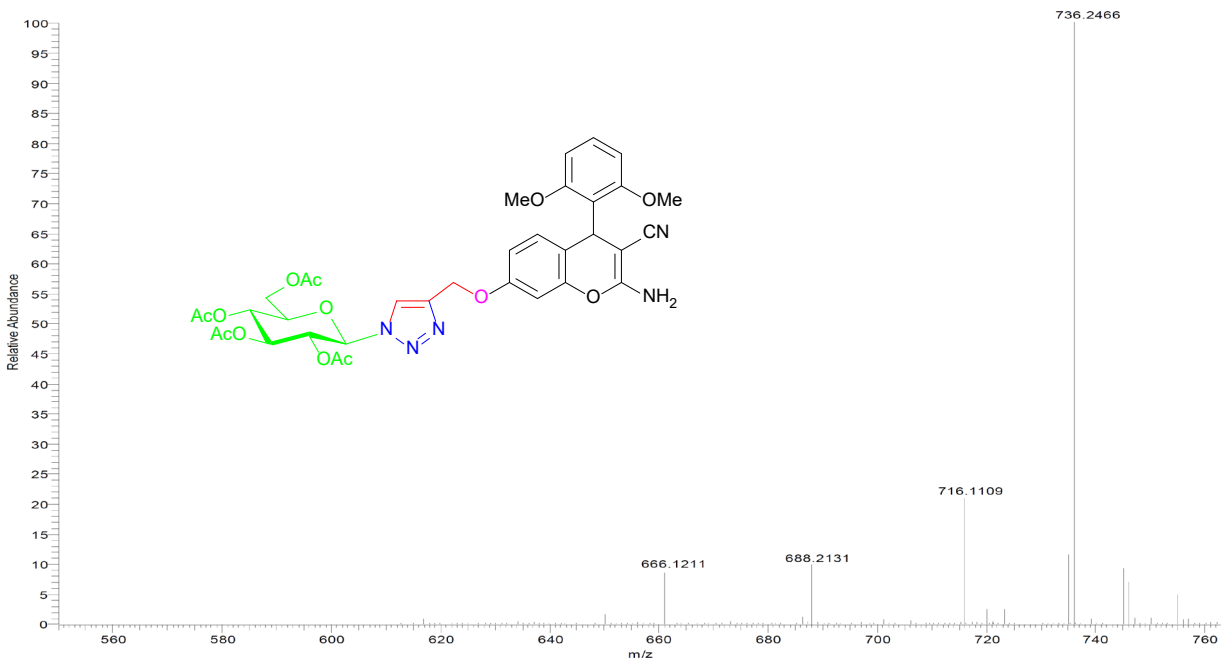

**2-Amino-4-(2-hydroxy-4-methoxyphenyl)-7-((1-(2,3,4,6-tetra-O-acetyl-β-D-glucopyranosyl)-1H-1,2,3-triazol-4-yl)methoxy)-4H-chromene-3-carbonitrile (7k)**

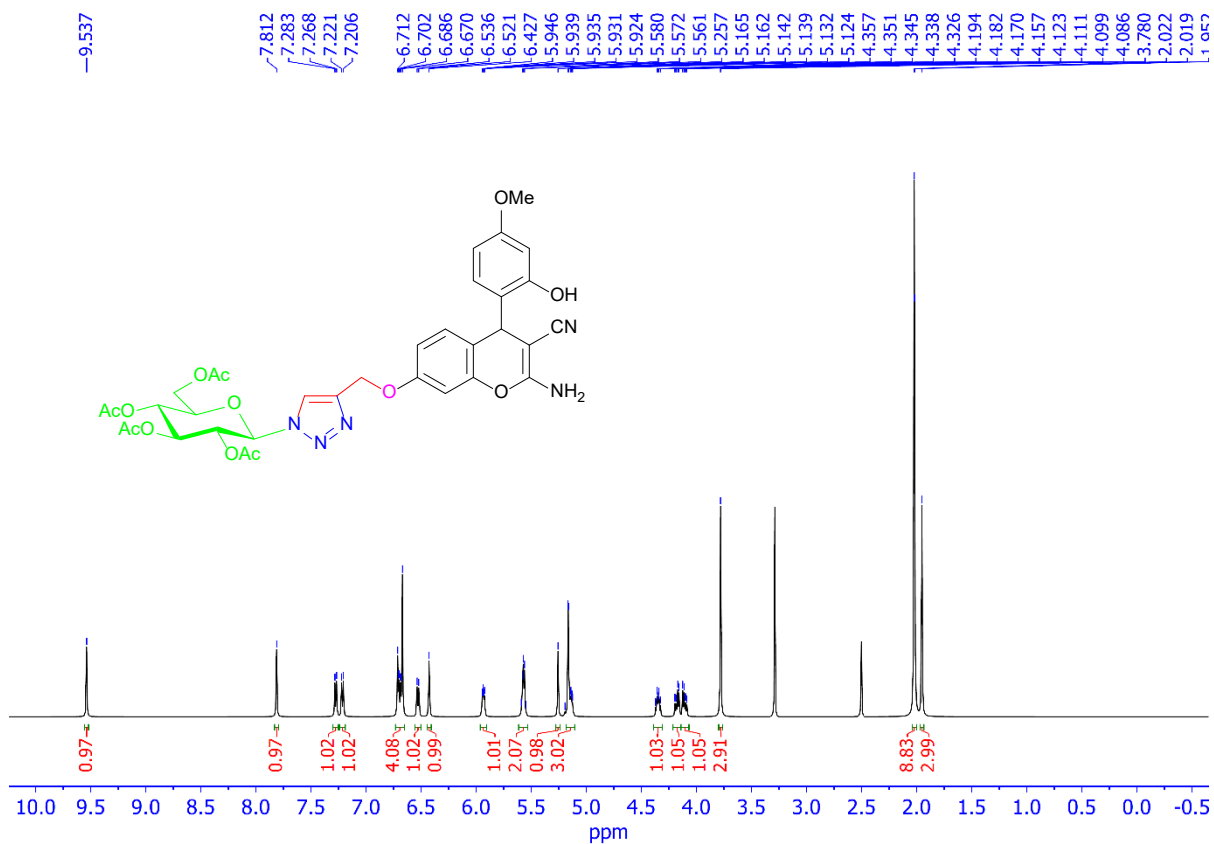

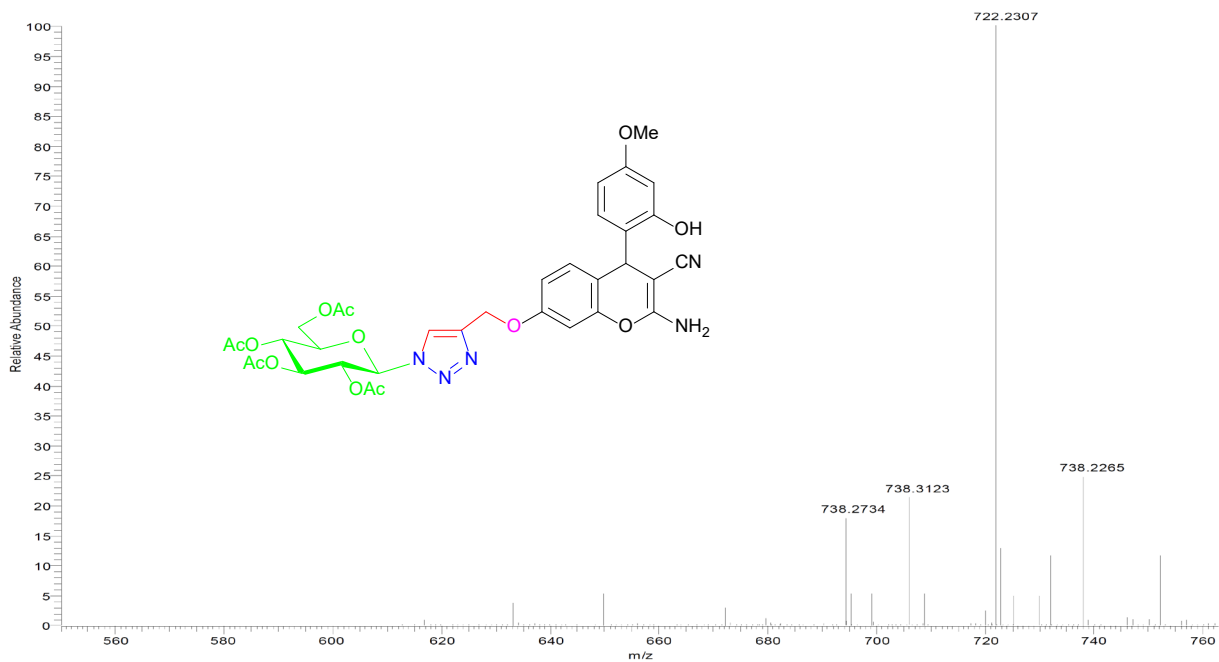

**2-Amino-4-(3-hydroxy-4-methoxyphenyl)-7-((1-(2,3,4,6-tetra-O-acetyl- $\beta$ -D-glucopyranosyl)-1H-1,2,3-triazol-4-yl)methoxy)-4H-chromene-3-carbonitrile (7l)**

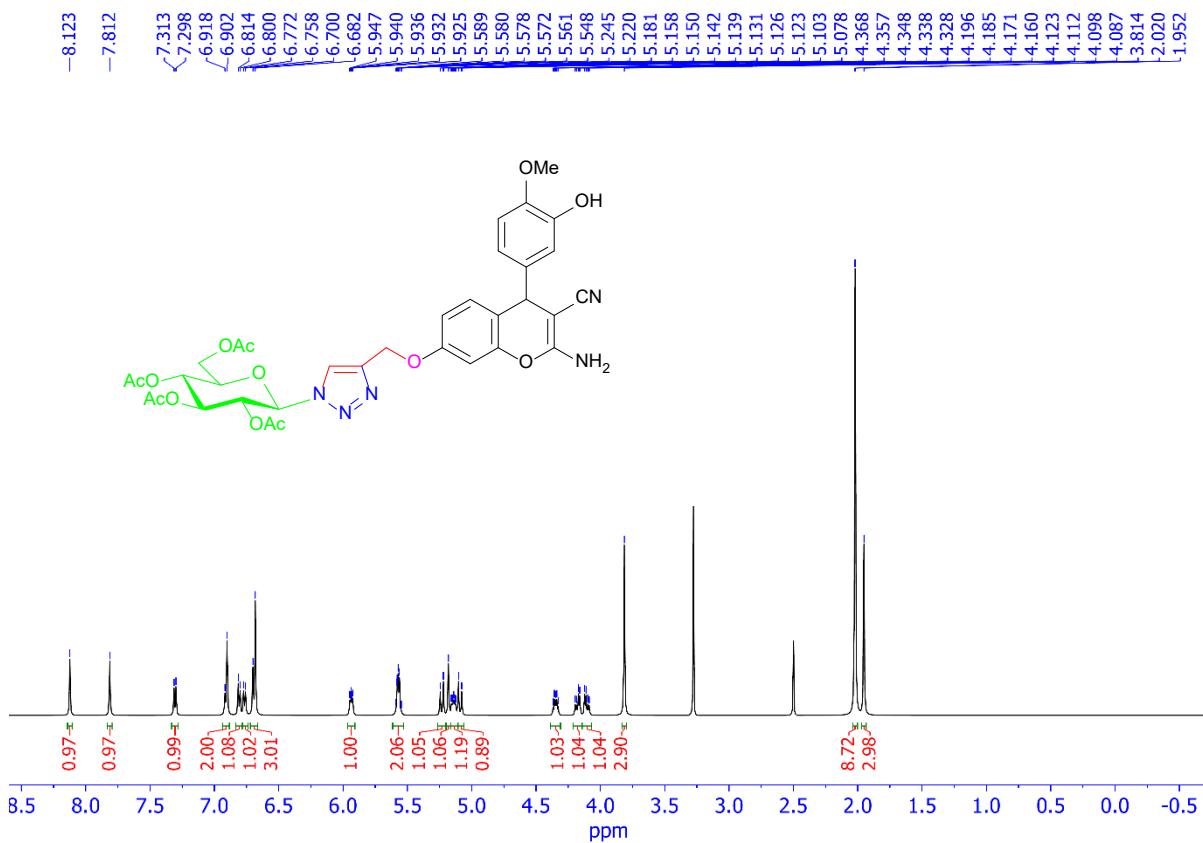

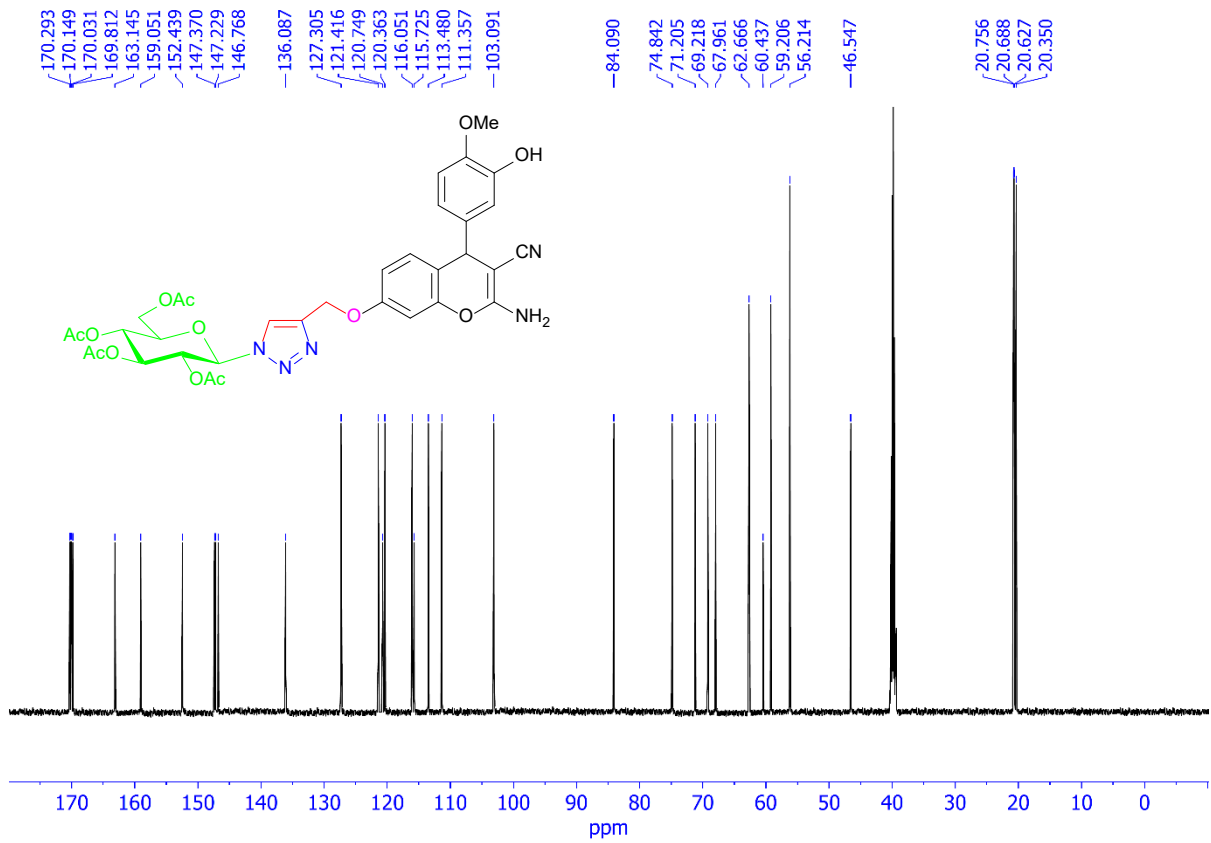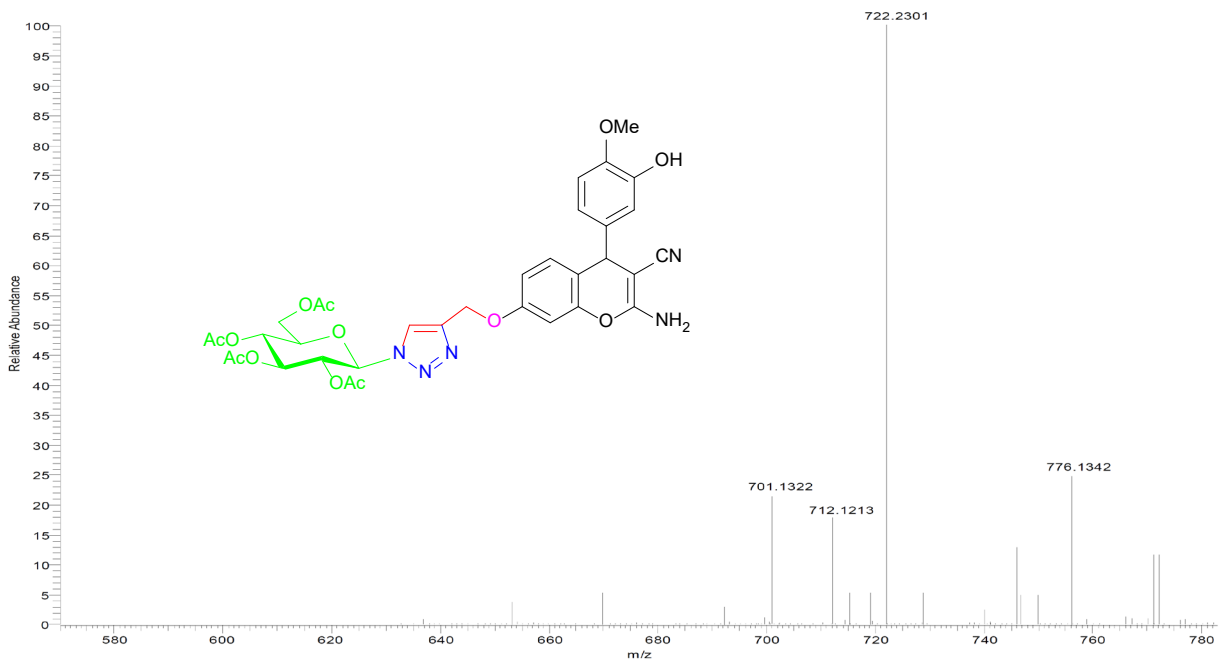

**2-Amino-4-(4-ethoxy-3-hydroxyphenyl)-7-((1-(2,3,4,6-tetra-O-acetyl-β-D-glucopyranosyl)-1H-1,2,3-triazol-4-yl)methoxy)-4H-chromene-3-carbonitrile (7m)**

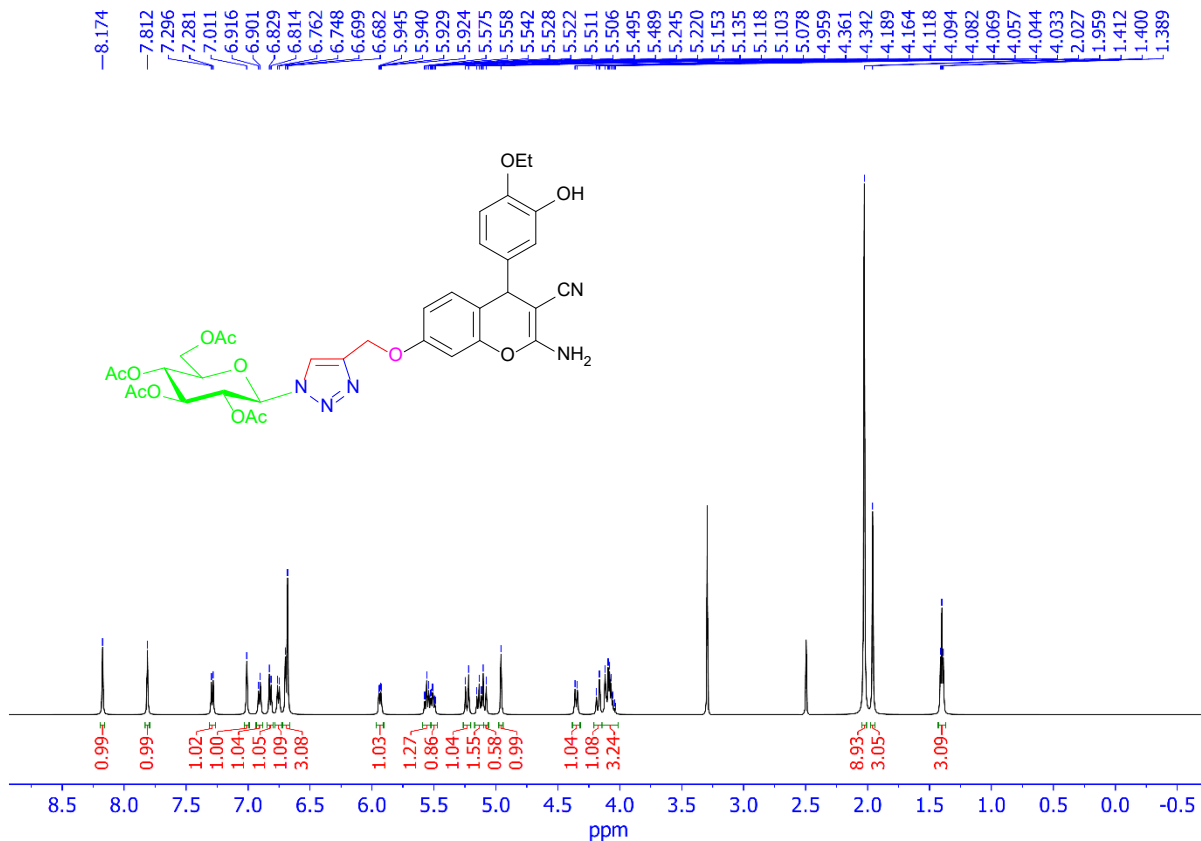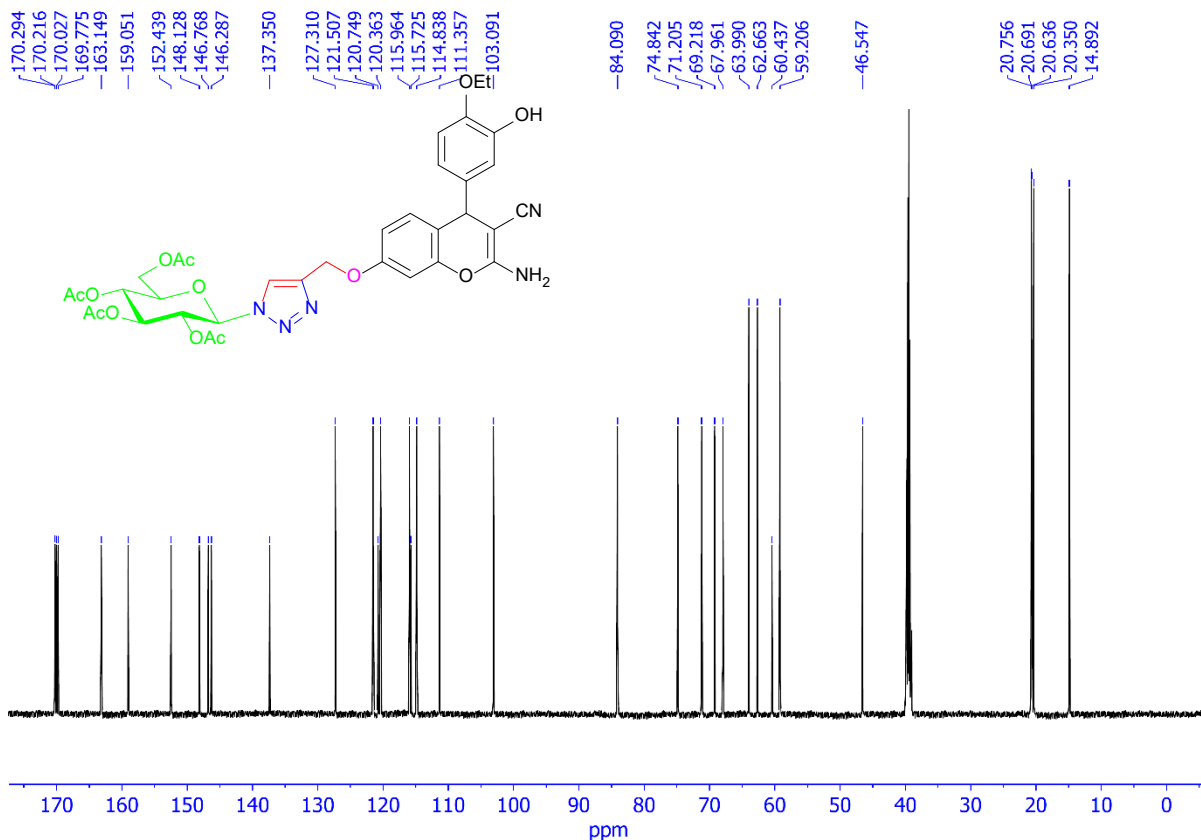



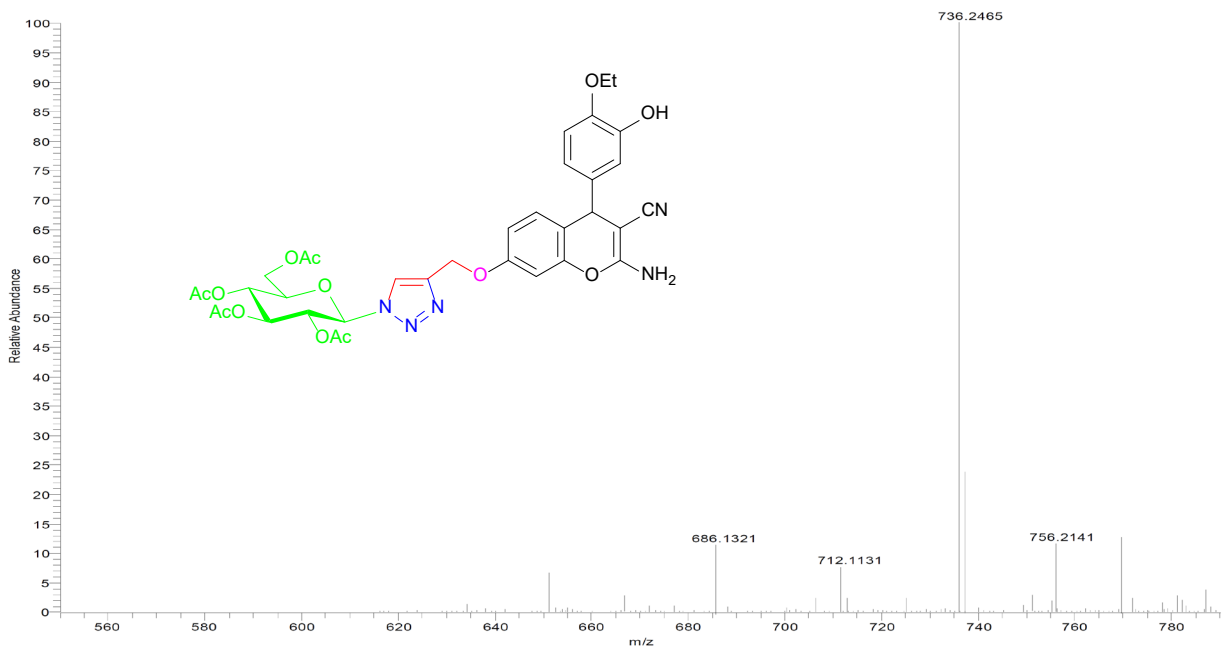

**2-Amino-4-(4-hydroxy-3-methoxy-5-nitrophenyl)-7-((1-(2,3,4,6-tetra-O-acetyl-β-D-glucopyranosyl)-1H-1,2,3-triazol-4-yl)methoxy)-4H-chromene-3-carbonitrile (7n)**

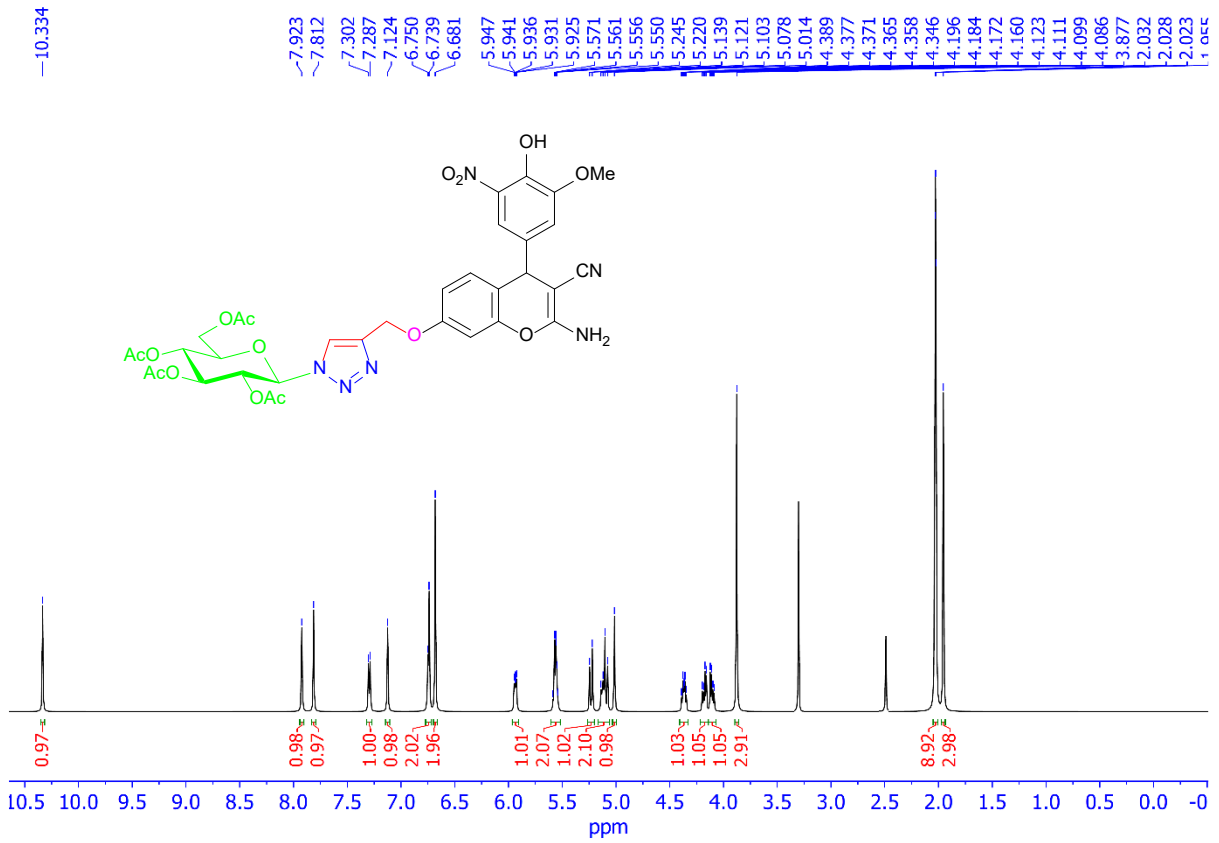

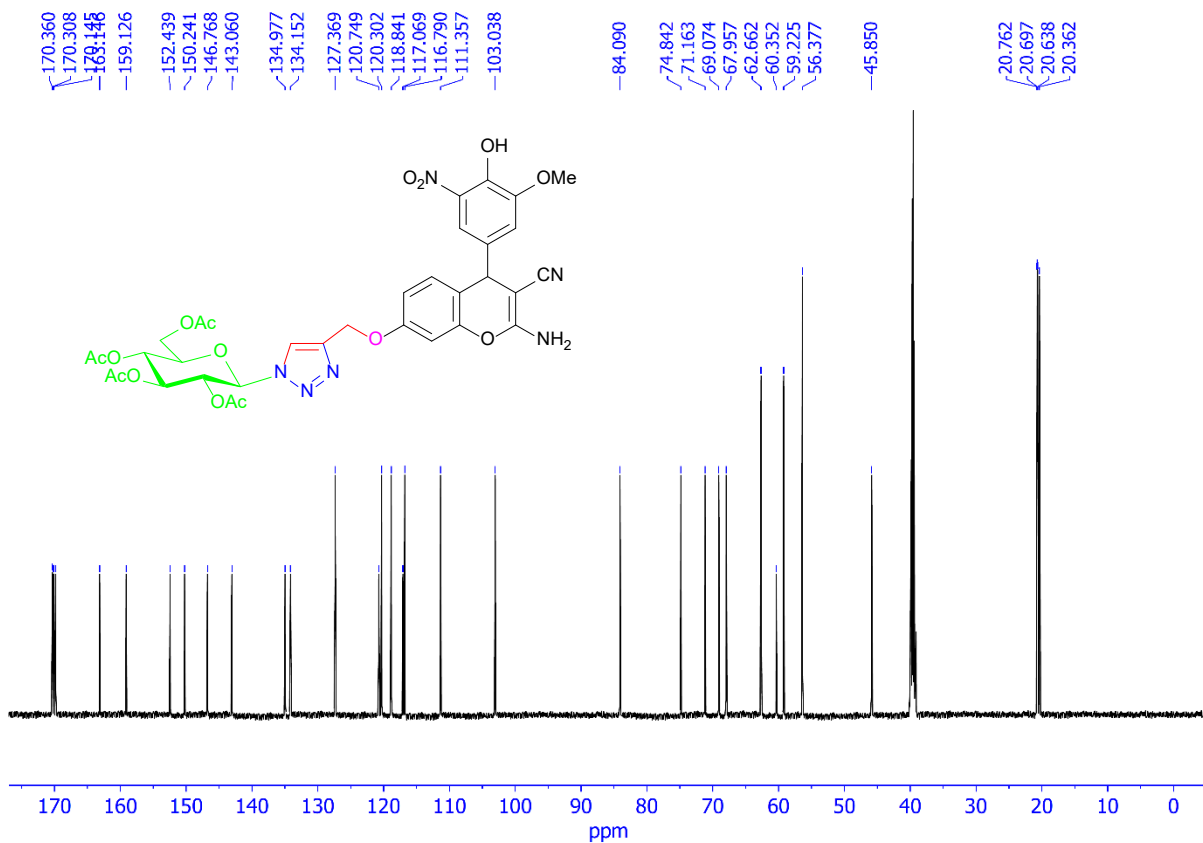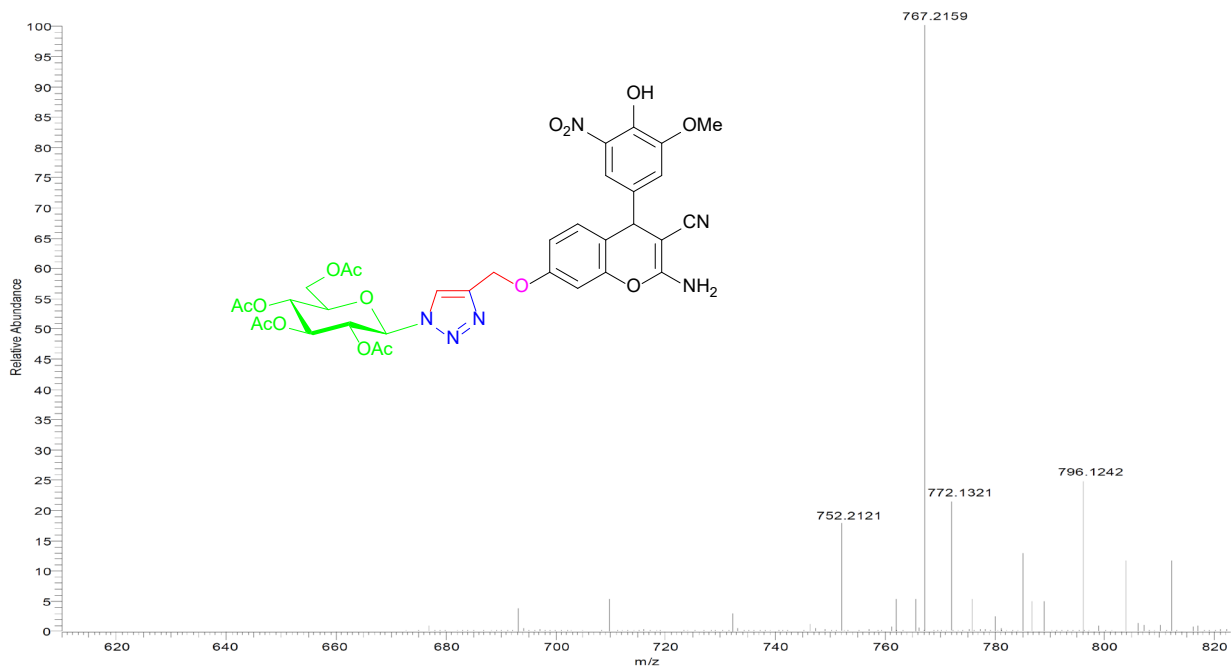

**2-Amino-4-(5-chloro-2-hydroxy-3-nitrophenyl)-7-((1-(2,3,4,6-tetra-O-acetyl- $\beta$ -D-glucopyranosyl)-1H-1,2,3-triazol-4-yl)methoxy)-4H-chromene-3-carbonitrile (7o)**

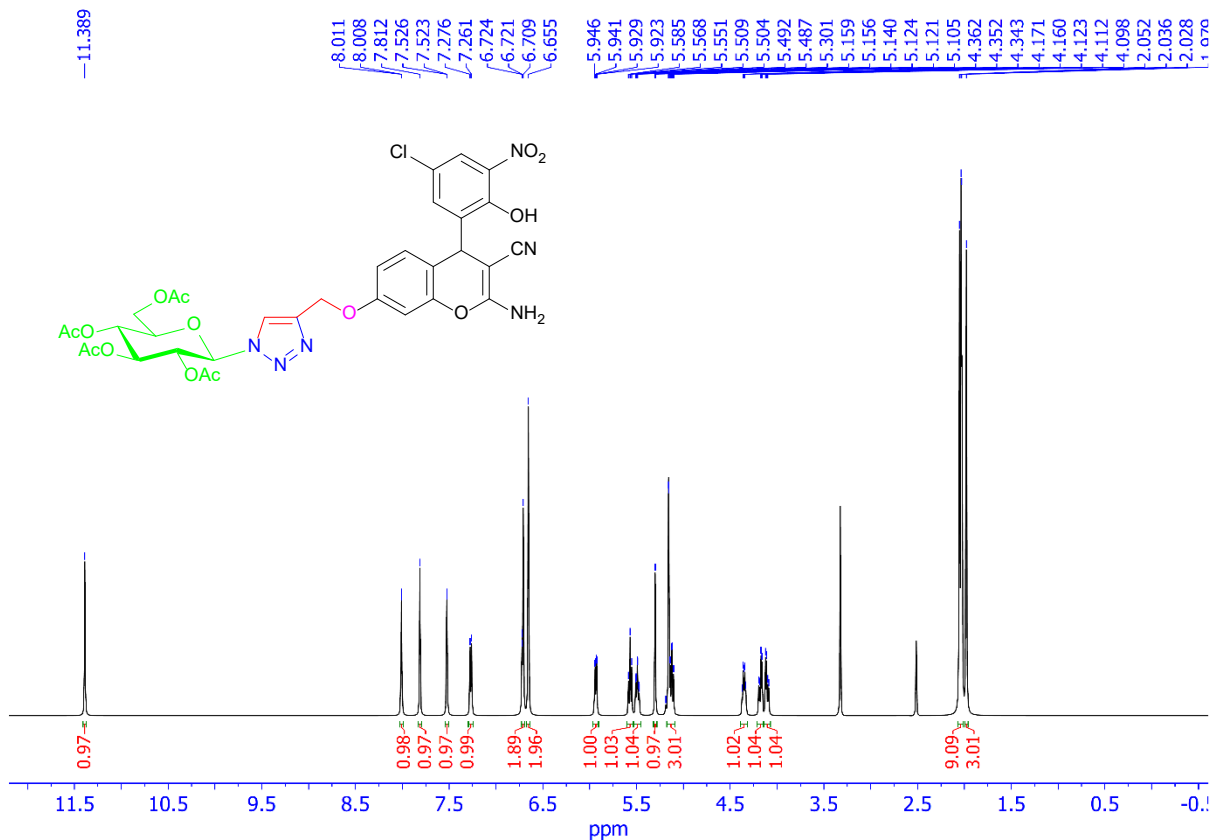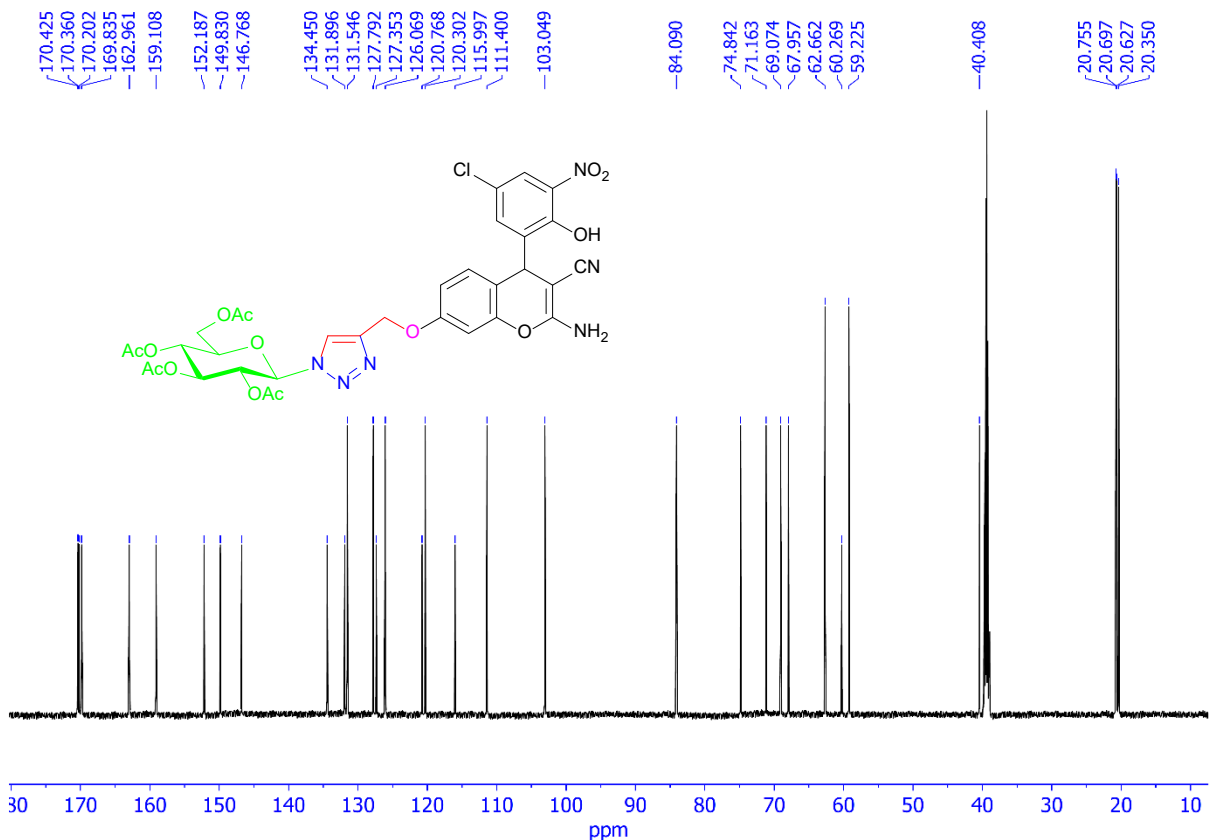

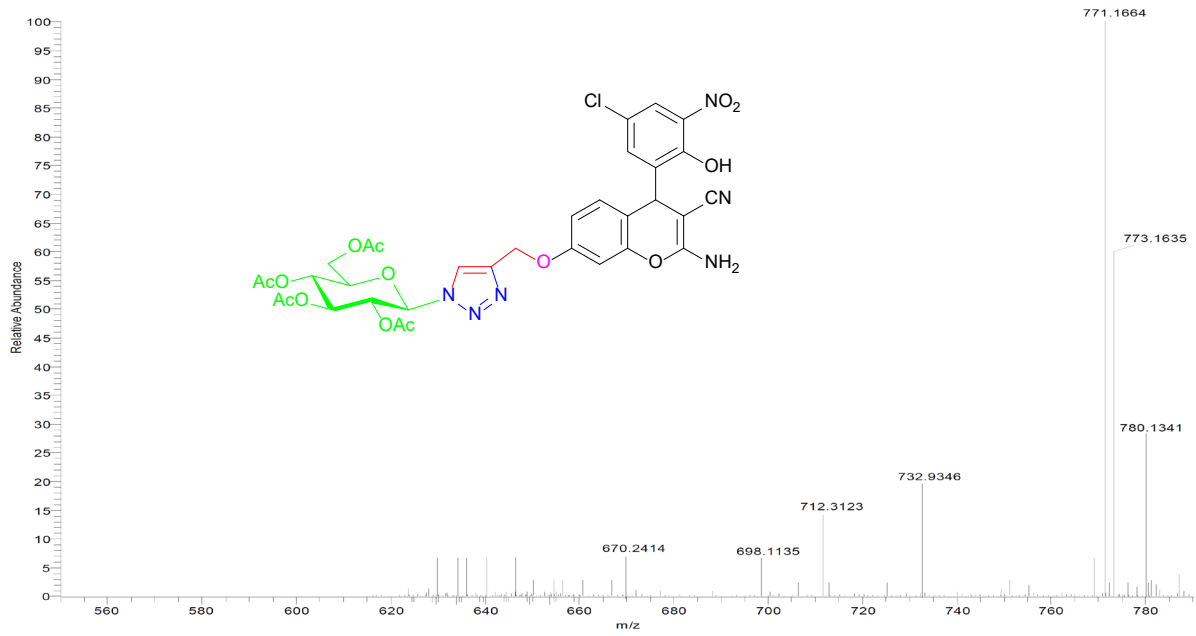

-----
